# Supplementary material for: The coral core microbiome identifies rare bacterial taxa as ubiquitous endosymbionts
Source: PubMed Central journal article supplement (PMC4579478; doi:10.1038/ismej.2015.39), 2015-04-17

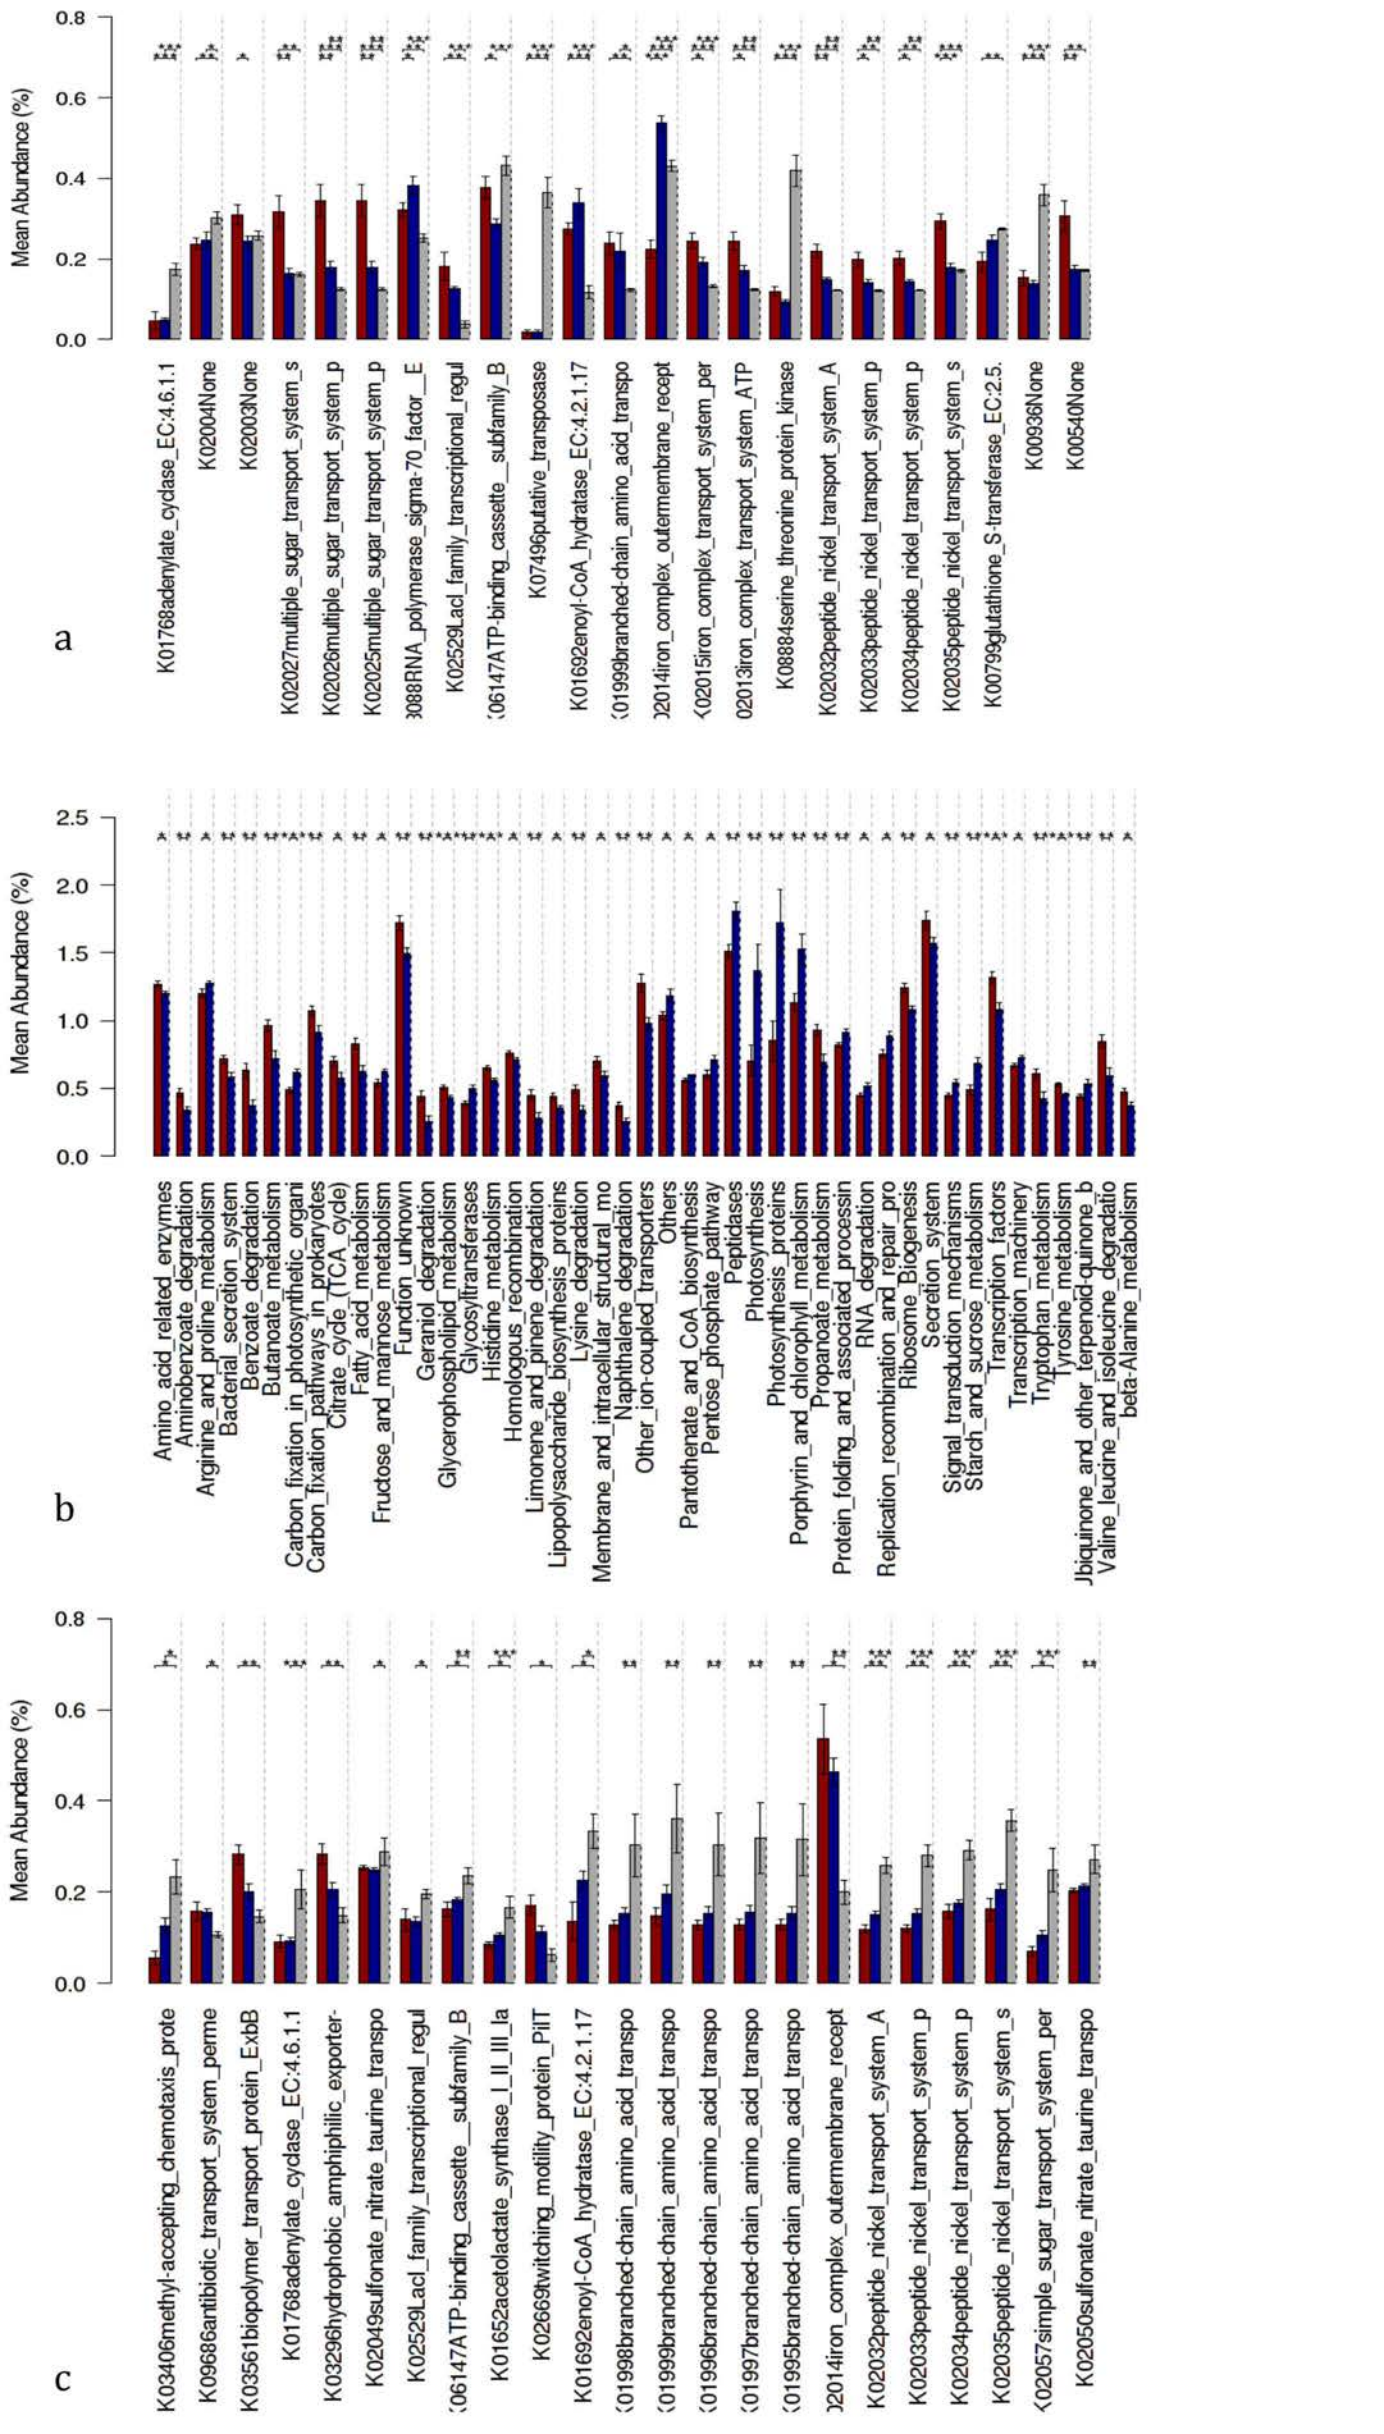

Supplement: ismej201539x4.pdf [file ismej201539x4.pdf]
