# Supplementary material for: The coral core microbiome identifies rare bacterial taxa as ubiquitous endosymbionts
Source: PubMed Central journal article supplement (PMC4579478; doi:10.1038/ismej.2015.39), 2015-04-17
Supplement: ismej201539x7.pdf [file ismej201539x7.pdf]

|                   |               |              |              |
|-------------------|---------------|--------------|--------------|
| <b>a</b>          |               | Symbiotic, p | Holobiont, p |
| Shannon diversity | Endosymbiotic | 0.012        | 0.008        |
|                   | Symbiotic     |              | 0.00005      |
| Richness          | Endosymbiotic | 0.46         | 0.15         |
|                   | Symbiotic     |              | 0.022        |
| ANOSIMS           | Endosymbiotic | 0.001        | 0.001        |
|                   | Symbiotic     |              | 0.001)       |
| <b>b</b>          |               |              | Holobiont    |
| Shannon diversity | Symbiotic     |              | 0.028        |
| Richness          | Symbiotic     |              | 0.038        |
| ADONIS            | Symbiotic     |              | 0.035        |
| <b>c</b>          |               |              | Holobiont    |
| Shannon diversity | Symbiotic     |              | 0.0045       |
| Richness          | Symbiotic     |              | 0.12         |
| ADONIS            | Symbiotic     |              | 0.003        |
