# Supplementary material for: The coral core microbiome identifies rare bacterial taxa as ubiquitous endosymbionts
Source: PubMed Central journal article supplement (PMC4579478; doi:10.1038/ismej.2015.39), 2015-04-17
Supplement: ismej201539x8.pdf [file ismej201539x8.pdf]

| a) Great Barrier Reef | <b>Min.</b> | <b>Median</b> | <b>Mean</b> | <b>Max.</b> |
|-----------------------|-------------|---------------|-------------|-------------|
| Holobiont             | 0.08791     | 0.3311        | 0.3119      | 0.3692      |
| Endosymbiotic         | 0.01725     | 0.02888       | 0.02928     | 0.04893     |
| Symbiotic             | 0.0265      | 0.05791       | 0.05604     | 0.08057     |
| b) Hawaii'            | <b>Min.</b> | <b>Median</b> | <b>Mean</b> | <b>Max.</b> |
| Holobiont             | 0.05775     | 0.1072        | 0.1116      | 0.1794      |
| Endsymbiotic          | 0.1087      | 0.1614        | 0.1485      | 0.1753      |
| Skeleton associated   | 0.08822     | 0.1225        | 0.1177      | 0.1423      |
